# Supplementary material
Source: PubMed Central journal article supplement (PMC5522733)
Supplement: NIHMS72910-supplement-Appendix_1.pdf [file NIHMS72910-supplement-Appendix_1.pdf]

## Supplementary Appendix 1.

Antipsychotic prescribing to patients diagnosed with dementia in the context of national guidance and drug safety warnings: longitudinal study in UK general practice

S Jill Stocks, Evangelos Kontopantelis, Roger T Webb, Anthony J Avery, Alistair Burns, Darren M Ashcroft

Correspondence to Dr Jill Stocks; NIHR Greater Manchester Primary Care Patient Safety Translational Research Centre, Centre for Primary Care, Division of Population Health, Health Services Research and Primary Care, School of Health Sciences, University of Manchester, Manchester M13 9PL, UK [jill.stocks@manchester.ac.uk](mailto:jill.stocks@manchester.ac.uk)

Table A. Dementia diagnosis codes

| Read code | Description                                              | medcode |
|-----------|----------------------------------------------------------|---------|
| A411.00   | Jakob-Creutzfeldt disease                                | 38286   |
| E00..00   | Senile and presenile organic psychotic conditions        | 33707   |
| E00..11   | Senile dementia                                          | 1916    |
| E00..12   | Senile/presenile dementia                                | 1350    |
| E000.00   | Uncomplicated senile dementia                            | 7323    |
| E001.00   | Presenile dementia                                       | 15165   |
| E001000   | Uncomplicated presenile dementia                         | 42602   |
| E001100   | Presenile dementia with delirium                         | 49513   |
| E001200   | Presenile dementia with paranoia                         | 30032   |
| E001300   | Presenile dementia with depression                       | 27677   |
| E001z00   | Presenile dementia NOS                                   | 38438   |
| E002.00   | Senile dementia with depressive or paranoid features     | 44674   |
| E002000   | Senile dementia with paranoia                            | 18386   |
| E002100   | Senile dementia with depression                          | 21887   |
| E002z00   | Senile dementia with depressive or paranoid features NOS | 41089   |
| E003.00   | Senile dementia with delirium                            | 37015   |
| E004.00   | Arteriosclerotic dementia                                | 19477   |
| E004.11   | Multi infarct dementia                                   | 8634    |
| E004000   | Uncomplicated arteriosclerotic dementia                  | 43089   |
| E004100   | Arteriosclerotic dementia with delirium                  | 56912   |
| E004200   | Arteriosclerotic dementia with paranoia                  | 55467   |
| E004300   | Arteriosclerotic dementia with depression                | 43292   |
| E004z00   | Arteriosclerotic dementia NOS                            | 42279   |
| E00y.00   | Other senile and presenile organic psychoses             | 15249   |
| E00y.11   | Presbyophrenic psychosis                                 | 51494   |
| E00z.00   | Senile or presenile psychoses NOS                        | 2882    |
| E012.00   | Other alcoholic dementia                                 | 54505   |
| E012.11   | Alcoholic dementia NOS                                   | 27342   |
| E012000   | Chronic alcoholic brain syndrome                         | 37946   |
| E02y100   | Drug-induced dementia                                    | 62132   |
| E041.00   | Dementia in conditions EC                                | 25386   |
| Eu00.00   | [X]Dementia in Alzheimer's disease                       | 7664    |

|         |                                                              |        |
|---------|--------------------------------------------------------------|--------|
| Eu00000 | [X]Dementia in Alzheimer's disease with early onset          | 49263  |
| Eu00011 | [X]Presenile dementia,Alzheimer's type                       | 25704  |
| Eu00012 | [X]Primary degen dementia, Alzheimer's type, presenile onset | 60059  |
| Eu00013 | [X]Alzheimer's disease type 2                                | 61528  |
| Eu00100 | [X]Dementia in Alzheimer's disease with late onset           | 38678  |
| Eu00111 | [X]Alzheimer's disease type 1                                | 46762  |
| Eu00112 | [X]Senile dementia,Alzheimer's type                          | 11379  |
| Eu00113 | [X]Primary degen dementia of Alzheimer's type, senile onset  | 43346  |
| Eu00200 | [X]Dementia in Alzheimer's dis, atypical or mixed type       | 30706  |
| Eu00z00 | [X]Dementia in Alzheimer's disease, unspecified              | 29386  |
| Eu00z11 | [X]Alzheimer's dementia unspec                               | 8195   |
| Eu01.00 | [X]Vascular dementia                                         | 6578   |
| Eu01.11 | [X]Arteriosclerotic dementia                                 | 9565   |
| Eu01000 | [X]Vascular dementia of acute onset                          | 46488  |
| Eu01100 | [X]Multi-infarct dementia                                    | 11175  |
| Eu01111 | [X]Predominantly cortical dementia                           | 55838  |
| Eu01200 | [X]Subcortical vascular dementia                             | 8934   |
| Eu01300 | [X]Mixed cortical and subcortical vascular dementia          | 31016  |
| Eu01y00 | [X]Other vascular dementia                                   | 55313  |
| Eu01z00 | [X]Vascular dementia, unspecified                            | 19393  |
| Eu02.00 | [X]Dementia in other diseases classified elsewhere           | 12621  |
| Eu02000 | [X]Dementia in Pick's disease                                | 28402  |
| Eu02100 | [X]Dementia in Creutzfeldt-Jakob disease                     | 54106  |
| Eu02200 | [X]Dementia in Huntington's disease                          | 37014  |
| Eu02300 | [X]Dementia in Parkinson's disease                           | 9509   |
| Eu02400 | [X]Dementia in human immunodef virus [HIV] disease           | 41185  |
| Eu02500 | [X]Lewy body dementia                                        | 26270  |
| Eu02y00 | [X]Dementia in other specified diseases classif elsewhere    | 64267  |
| Eu02z00 | [X] Unspecified dementia                                     | 4693   |
| Eu02z11 | [X] Presenile dementia NOS                                   | 48501  |
| Eu02z12 | [X] Presenile psychosis NOS                                  | 47619  |
| Eu02z13 | [X] Primary degenerative dementia NOS                        | 34944  |
| Eu02z14 | [X] Senile dementia NOS                                      | 4357   |
| Eu02z15 | [X] Senile psychosis NOS                                     | 27935  |
| Eu02z16 | [X] Senile dementia, depressed or paranoid type              | 27759  |
| Eu04100 | [X]Delirium superimposed on dementia                         | 53446  |
| Eu05700 | [X]Mild cognitive disorder                                   | 11936  |
| F110.00 | Alzheimer's disease                                          | 1917   |
| F110000 | Alzheimer's disease with early onset                         | 16797  |
| F110100 | Alzheimer's disease with late onset                          | 32057  |
| F111.00 | Pick's disease                                               | 11136  |
| F1110A  |                                                              | 89580  |
| F112.00 | Senile degeneration of brain                                 | 29512  |
| F116.00 | Lewy body disease                                            | 7572   |
| F118.00 |                                                              | 104534 |
| F11x.00 | Cerebral degeneration in other disease EC                    | 97422  |

|         |                                                             |       |
|---------|-------------------------------------------------------------|-------|
| F11x000 | Cerebral degeneration due to alcoholism                     | 47555 |
| F11x011 | Alcoholic encephalopathy                                    | 36748 |
| F11x200 | Cerebral degeneration due to cerebrovascular disease        | 54744 |
| F11x400 | Cerebral degeneration due to neoplastic disease             | 70957 |
| F11x500 | Cerebral degeneration due to myxoedema                      | 47658 |
| F11x600 | Cerebral degeneration due to vitamin B12 deficiency         | 24581 |
| F11x700 | Cerebral degeneration due to Jakob - Creutzfeldt disease    | 48531 |
| F11x800 | Cerebral degeneration due to multifocal leucoencephalopathy | 99684 |
| F11x900 | Cerebral degeneration in Parkinson's disease                | 96860 |
| F11xz00 | Cerebral degeneration other disease NOS                     | 44592 |
| F11y.00 | Other cerebral degeneration                                 | 34976 |
| F11y000 | Reye's syndrome                                             | 33353 |
| F11y100 | Cerebral ataxia                                             | 15261 |
| F11yz00 | Other cerebral degeneration NOS                             | 31524 |
| F11z.00 | Cerebral degeneration NOS                                   | 5651  |
| F11z.11 | Cerebral atrophy                                            | 2731  |
| F134.00 | Huntington's chorea                                         | 3591  |
| Fyu3000 | [X]Other Alzheimer's disease                                | 59122 |

Table B. Psychosis diagnosis codes

| Read code | Description                                              | medcode |
|-----------|----------------------------------------------------------|---------|
| E001200   | Presenile dementia with paranoia                         | 30032   |
| E002000   | Senile dementia with paranoia                            | 18386   |
| E002z00   | Senile dementia with depressive or paranoid features NOS | 41089   |
| E004200   | Arteriosclerotic dementia with paranoia                  | 55467   |
| E00y.00   | Other senile and presenile organic psychoses             | 15249   |
| E00y.11   | Presbyophrenic psychosis                                 | 51494   |
| E00z.00   | Senile or presenile psychoses NOS                        | 2882    |
| E04..00   | Other chronic organic psychoses                          | 62087   |
| E04y.00   | Other specified chronic organic psychoses                | 23677   |
| E04z.00   | Chronic organic psychosis NOS                            | 39625   |
| E0y..00   | Other specified organic psychoses                        | 66545   |
| E0z..00   | Organic psychoses NOS                                    | 36861   |
| E10..00   | Schizophrenic disorders                                  | 854     |
| E100.00   | Simple schizophrenia                                     | 32222   |
| E100.11   | Schizophrenia simplex                                    | 73295   |
| E100000   | Unspecified schizophrenia                                | 15733   |
| E100100   | Subchronic schizophrenia                                 | 23616   |
| E100200   | Chronic schizophrenic                                    | 3984    |
| E100300   | Acute exacerbation of subchronic schizophrenia           | 57666   |
| E100400   | Acute exacerbation of chronic schizophrenia              | 44498   |
| E100500   | Schizophrenia in remission                               | 58687   |
| E100z00   | Simple schizophrenia NOS                                 | 53625   |
| E101.00   | Hebephrenic schizophrenia                                | 30619   |
| E101000   | Unspecified hebephrenic schizophrenia                    | 66506   |

|         |                                                              |        |
|---------|--------------------------------------------------------------|--------|
| E101400 | Acute exacerbation of chronic hebephrenic schizophrenia      | 97919  |
| E101500 | Hebephrenic schizophrenia in remission                       | 67768  |
| E101z00 | Hebephrenic schizophrenia NOS                                | 48054  |
| E102.00 | Catatonic schizophrenia                                      | 25546  |
| E102000 | Unspecified catatonic schizophrenia                          | 58716  |
| E102100 | Subchronic catatonic schizophrenia                           | 99199  |
| E102500 | Catatonic schizophrenia in remission                         | 102427 |
| E102z00 | Catatonic schizophrenia NOS                                  | 63867  |
| E103.00 | Paranoid schizophrenia                                       | 1494   |
| E103000 | Unspecified paranoid schizophrenia                           | 33383  |
| E103200 | Chronic paranoid schizophrenia                               | 31362  |
| E103300 | Acute exacerbation of subchronic paranoid schizophrenia      | 51322  |
| E103400 | Acute exacerbation of chronic paranoid schizophrenia         | 53032  |
| E103500 | Paranoid schizophrenia in remission                          | 36172  |
| E103z00 | Paranoid schizophrenia NOS                                   | 9281   |
| E104.00 | Acute schizophrenic episode                                  | 576    |
| E104.11 | Oneirophrenia                                                | 93167  |
| E105.00 | Latent schizophrenia                                         | 66410  |
| E105000 | Unspecified latent schizophrenia                             | 102311 |
| E105200 | Chronic latent schizophrenia                                 | 94299  |
| E105500 | Latent schizophrenia in remission                            | 96883  |
| E105z00 | Latent schizophrenia NOS                                     | 102446 |
| E106.00 | Residual schizophrenia                                       | 38063  |
| E107.00 | Schizo-affective schizophrenia                               | 2117   |
| E107.11 | Cyclic schizophrenia                                         | 99000  |
| E107000 | Unspecified schizo-affective schizophrenia                   | 58862  |
| E107100 | Subchronic schizo-affective schizophrenia                    | 61098  |
| E107200 | Chronic schizo-affective schizophrenia                       | 43800  |
| E107300 | Acute exacerbation subchronic schizo-affective schizophrenia | 58866  |
| E107400 | Acute exacerbation of chronic schizo-affective schizophrenia | 63478  |
| E107500 | Schizo-affective schizophrenia in remission                  | 56438  |
| E107z00 | Schizo-affective schizophrenia NOS                           | 10575  |
| E10y.00 | Other schizophrenia                                          | 39062  |
| E10y.11 | Cenesthopathic schizophrenia                                 | 92994  |
| E10y000 | Atypical schizophrenia                                       | 33338  |
| E10y100 | Coenesthopathic schizophrenia                                | 99070  |
| E10yz00 | Other schizophrenia NOS                                      | 49761  |
| E10z.00 | Schizophrenia NOS                                            | 8407   |
| E111.00 | Recurrent manic episodes                                     | 26227  |
| E111000 | Recurrent manic episodes, unspecified                        | 19967  |
| E111100 | Recurrent manic episodes, mild                               | 46425  |
| E111200 | Recurrent manic episodes, moderate                           | 27739  |
| E111300 | Recurrent manic episodes, severe without mention psychosis   | 65811  |
| E111400 | Recurrent manic episodes, severe, with psychosis             | 32295  |
| E111500 | Recurrent manic episodes, partial or unspecified remission   | 58863  |
| E111600 | Recurrent manic episodes, in full remission                  | 37178  |

|         |                                                              |       |
|---------|--------------------------------------------------------------|-------|
| E111z00 | Recurrent manic episode NOS                                  | 46415 |
| E113400 | Recurrent major depressive episodes, severe, with psychosis  | 24171 |
| E114.00 | Bipolar affective disorder, currently manic                  | 3702  |
| E114.11 | Manic-depressive - now manic                                 | 17385 |
| E114000 | Bipolar affective disorder, currently manic, unspecified     | 35738 |
| E114100 | Bipolar affective disorder, currently manic, mild            | 36126 |
| E114200 | Bipolar affective disorder, currently manic, moderate        | 46434 |
| E114300 | Bipolar affect disord, currently manic, severe, no psychosis | 16347 |
| E114400 | Bipolar affect disord, currently manic,severe with psychosis | 55829 |
| E114500 | Bipolar affect disord,currently manic, part/unspec remission | 59011 |
| E114600 | Bipolar affective disorder, currently manic, full remission  | 63784 |
| E114z00 | Bipolar affective disorder, currently manic, NOS             | 57605 |
| E115.00 | Bipolar affective disorder, currently depressed              | 4677  |
| E115.11 | Manic-depressive - now depressed                             | 12831 |
| E115000 | Bipolar affective disorder, currently depressed, unspecified | 15923 |
| E115100 | Bipolar affective disorder, currently depressed, mild        | 35734 |
| E115200 | Bipolar affective disorder, currently depressed, moderate    | 27890 |
| E115300 | Bipolar affect disord, now depressed, severe, no psychosis   | 35607 |
| E115400 | Bipolar affect disord, now depressed, severe with psychosis  | 63701 |
| E115500 | Bipolar affect disord, now depressed, part/unspec remission  | 72026 |
| E115600 | Bipolar affective disorder, now depressed, in full remission | 57465 |
| E115z00 | Bipolar affective disorder, currently depressed, NOS         | 37296 |
| E116.00 | Mixed bipolar affective disorder                             | 31316 |
| E116000 | Mixed bipolar affective disorder, unspecified                | 31535 |
| E116100 | Mixed bipolar affective disorder, mild                       | 24689 |
| E116200 | Mixed bipolar affective disorder, moderate                   | 63150 |
| E116300 | Mixed bipolar affective disorder, severe, without psychosis  | 63284 |
| E116400 | Mixed bipolar affective disorder, severe, with psychosis     | 54195 |
| E116500 | Mixed bipolar affective disorder, partial/unspec remission   | 63651 |
| E116600 | Mixed bipolar affective disorder, in full remission          | 55064 |
| E116z00 | Mixed bipolar affective disorder, NOS                        | 63583 |
| E117.00 | Unspecified bipolar affective disorder                       | 14784 |
| E117000 | Unspecified bipolar affective disorder, unspecified          | 49763 |
| E117100 | Unspecified bipolar affective disorder, mild                 | 63698 |
| E117200 | Unspecified bipolar affective disorder, moderate             | 68647 |
| E117300 | Unspecified bipolar affective disorder, severe, no psychosis | 73423 |
| E117400 | Unspecified bipolar affective disorder,severe with psychosis | 68326 |
| E117500 | Unspecified bipolar affect disord, partial/unspec remission  | 70721 |
| E117600 | Unspecified bipolar affective disorder, in full remission    | 24230 |
| E117z00 | Unspecified bipolar affective disorder, NOS                  | 27986 |
| E11y.00 | Other and unspecified manic-depressive psychoses             | 60178 |
| E11y000 | Unspecified manic-depressive psychoses                       | 11596 |
| E11y100 | Atypical manic disorder                                      | 70925 |
| E11y200 | Atypical depressive disorder                                 | 27491 |
| E11y300 | Other mixed manic-depressive psychoses                       | 70399 |
| E11yz00 | Other and unspecified manic-depressive psychoses NOS         | 33426 |

|         |                                                              |        |
|---------|--------------------------------------------------------------|--------|
| E11z.00 | Other and unspecified affective psychoses                    | 41992  |
| E11z000 | Unspecified affective psychoses NOS                          | 54607  |
| E11zz00 | Other affective psychosis NOS                                | 33425  |
| E12..00 | Paranoid states                                              | 4261   |
| E120.00 | Simple paranoid state                                        | 14743  |
| E121.00 | Chronic paranoid psychosis                                   | 3890   |
| E122.00 | Paraphrenia                                                  | 14971  |
| E123.00 | Shared paranoid disorder                                     | 62680  |
| E123.11 | Folie a deux                                                 | 50868  |
| E12y.00 | Other paranoid states                                        | 31589  |
| E12y000 | Paranoia querulans                                           | 66766  |
| E12yz00 | Other paranoid states NOS                                    | 31455  |
| E12z.00 | Paranoid psychosis NOS                                       | 12771  |
| E13..00 | Other nonorganic psychoses                                   | 31984  |
| E130.00 | Reactive depressive psychosis                                | 8478   |
| E130.11 | Psychotic reactive depression                                | 17770  |
| E134.00 | Psychogenic paranoid psychosis                               | 24345  |
| E141.00 | Disintegrative psychosis                                     | 56143  |
| E141.11 | Heller's syndrome                                            | 31599  |
| E141100 | Residual disintegrative psychoses                            | 41207  |
| E14y.00 | Other childhood psychoses                                    | 71819  |
| E14y000 | Atypical childhood psychoses                                 | 24244  |
| E14y100 | Borderline psychosis of childhood                            | 69155  |
| E14yz00 | Other childhood psychoses NOS                                | 66757  |
| E14z.00 | Child psychosis NOS                                          | 52849  |
| E14z.11 | Childhood schizophrenia NOS                                  | 37395  |
| E1y..00 | Other specified non-organic psychoses                        | 16537  |
| E1z..00 | Non-organic psychosis NOS                                    | 22188  |
| Eu05000 | [X]Organic hallucinosis                                      | 25338  |
| Eu05200 | [X]Organic delusional [schizophrenia-like] disorder          | 21986  |
| Eu10700 | [X]Men & behav dis due alcoh: resid & late-onset psychot dis | 62000  |
| Eu11700 | [X]Men & beh dis due opioids: resid & late-onset psychot dis | 27652  |
| Eu12700 | [X]Mnt/bh dis due cannabinds: resid & late-onset psychot dis | 57574  |
| Eu14700 | [X]Men & beh dis due cocaine: resid & late-onset psychot dis | 102591 |
| Eu15700 | [X]Mnt/bh dis oth stm inc caffne resid/late-onset psycht dis | 59163  |
| Eu16711 | [X]Post hallucinogen perception disorder                     | 35196  |
| Eu18500 | [X]Mental & behav dis due to vol solvents: psychotic disordr | 98618  |
| Eu16500 | [X]Mental & behav dis due to hallucinogens: psychotic disord | 54983  |
| Eu19700 | [X]Men/beh dis mlt drg use/oth subs: resid/late psychot dis  | 56948  |
| Eu20.00 | [X]Schizophrenia                                             | 34236  |
| Eu20000 | [X]Paranoid schizophrenia                                    | 16764  |
| Eu20011 | [X]Paraphrenic schizophrenia                                 | 50060  |
| Eu20100 | [X]Hebephrenic schizophrenia                                 | 43405  |
| Eu20111 | [X]Disorganised schizophrenia                                | 53985  |
| Eu20200 | [X]Catatonic schizophrenia                                   | 61501  |
| Eu20211 | [X]Catatonic stupor                                          | 20572  |

|         |                                                    |       |
|---------|----------------------------------------------------|-------|
| Eu20212 | [X]Schizophrenic catalepsy                         | 64533 |
| Eu20213 | [X]Schizophrenic catatonia                         | 35877 |
| Eu20214 | [X]Schizophrenic flexibilatis cerea                | 31493 |
| Eu20300 | [X]Undifferentiated schizophrenia                  | 60013 |
| Eu20311 | [X]Atypical schizophrenia                          | 91547 |
| Eu20400 | [X]Post-schizophrenic depression                   | 20785 |
| Eu20500 | [X]Residual schizophrenia                          | 64264 |
| Eu20511 | [X]Chronic undifferentiated schizophrenia          | 24107 |
| Eu20600 | [X]Simple schizophrenia                            | 35848 |
| Eu20y00 | [X]Other schizophrenia                             | 49420 |
| Eu20y12 | [X]Schizophreniform disord NOS                     | 94001 |
| Eu20y13 | [X]Schizophrenifrm psychos NOS                     | 18053 |
| Eu20z00 | [X]Schizophrenia, unspecified                      | 34966 |
| 1BH..00 | Delusions                                          | 1915  |
| 1BH..11 | Delusion                                           | 17982 |
| 1BH0.00 | Delusion of persecution                            | 43462 |
| 1BH1.00 | Grandiose delusions                                | 32875 |
| 1BH2.00 | Ideas of reference                                 | 55479 |
| 1BH3.00 | Paranoid ideation                                  | 22643 |
| E001100 | Presenile dementia with delirium                   | 49513 |
| E003.00 | Senile dementia with delirium                      | 37015 |
| E004100 | Arteriosclerotic dementia with delirium            | 56912 |
| E010.00 | Alcohol withdrawal delirium                        | 16225 |
| E010.11 | DTs - delirium tremens                             | 22277 |
| E010.12 | Delirium tremens                                   | 1476  |
| E011000 | Korsakov's alcoholic psychosis                     | 4500  |
| E013.00 | Alcohol withdrawal hallucinosis                    | 25110 |
| E015.00 | Alcoholic paranoia                                 | 30404 |
| E01yz00 | Other alcoholic psychosis NOS                      | 68111 |
| E01z.00 | Alcoholic psychosis NOS                            | 67651 |
| E021.00 | Drug-induced paranoia or hallucinatory states      | 45997 |
| E021000 | Drug-induced paranoid state                        | 12628 |
| E021100 | Drug-induced hallucinosis                          | 20026 |
| E021z00 | Drug-induced paranoia or hallucinatory state NOS   | 26481 |
| E02y000 | Drug-induced delirium                              | 29783 |
| E02yz00 | Other drug psychoses NOS                           | 28767 |
| E02z.00 | Drug psychosis NOS                                 | 26002 |
| E03..00 | Transient organic psychoses                        | 55150 |
| E030.00 | Acute confusional state                            | 4033  |
| E030.11 | Delirium - acute organic                           | 22466 |
| E030.12 | Toxic confusional state                            | 3486  |
| E030000 | Acute confusional state, post traumatic            | 25051 |
| E030100 | Acute confusional state, of infective origin       | 50683 |
| E030200 | Acute confusional state, of endocrine origin       | 94079 |
| E030300 | Acute confusional state, of metabolic origin       | 70409 |
| E030400 | Acute confusional state, of cerebrovascular origin | 25114 |

|         |                                                               |       |
|---------|---------------------------------------------------------------|-------|
| E030z00 | Acute confusional state NOS                                   | 41537 |
| E031.00 | Subacute confusional state                                    | 17021 |
| E031.11 | Delirium - subacute organic                                   | 24077 |
| E031000 | Subacute confusional state, post traumatic                    | 61238 |
| E031100 | Subacute confusional state, of infective origin               | 69359 |
| E031300 | Subacute confusional state, of metabolic origin               | 38671 |
| E031400 | Subacute confusional state, of cerebrovascular origin         | 24035 |
| E031z00 | Subacute confusional state NOS                                | 55784 |
| E03y.00 | Other transient organic psychoses                             | 68201 |
| E03y000 | Organic delusional syndrome                                   | 10543 |
| E03y100 | Organic hallucinosis syndrome                                 | 47109 |
| E03y200 | Organic affective syndrome                                    | 24510 |
| E03y300 | Unspecified puerperal psychosis                               | 2114  |
| E03yz00 | Other transient organic psychoses NOS                         | 59197 |
| E03z.00 | Transient organic psychoses NOS                               | 57637 |
| E110.00 | Manic disorder, single episode                                | 37070 |
| E110.11 | Hypomanic psychoses                                           | 18909 |
| E110000 | Single manic episode, unspecified                             | 20110 |
| E110100 | Single manic episode, mild                                    | 14728 |
| E110200 | Single manic episode, moderate                                | 24640 |
| E110300 | Single manic episode, severe without mention of psychosis     | 43093 |
| E110400 | Single manic episode, severe, with psychosis                  | 50218 |
| E110600 | Single manic episode in full remission                        | 70000 |
| E110z00 | Manic disorder, single episode NOS                            | 36611 |
| E112400 | Single major depressive episode, severe, with psychosis       | 32159 |
| E131.00 | Acute hysterical psychosis                                    | 29937 |
| E133.00 | Acute paranoid reaction                                       | 15053 |
| E13y.00 | Other reactive psychoses                                      | 16333 |
| E13y000 | Psychogenic stupor                                            | 22117 |
| E13y100 | Brief reactive psychosis                                      | 23538 |
| E13yz00 | Other reactive psychoses NOS                                  | 26119 |
| Eu04.00 | [X]Delirium, not induced by alcohol+other psychoactive subs   | 25066 |
| Eu04.11 | [X]Acute / subacute brain syndrome                            | 39337 |
| Eu04.12 | [X]Acute / subacute confusional state, nonalcoholic           | 7389  |
| Eu04.13 | [X]Acute / subacute infective psychosis                       | 24387 |
| Eu04.14 | [X]Acute / subacute organic reaction                          | 21933 |
| Eu04.15 | [X]Acute / subacute psycho-organic reaction                   | 22065 |
| Eu04000 | [X]Delirium not superimposed on dementia, so described        | 68125 |
| Eu04100 | [X]Delirium superimposed on dementia                          | 53446 |
| Eu04y00 | [X]Other delirium                                             | 52394 |
| Eu04z00 | [X]Delirium, unspecified                                      | 53924 |
| Eu10400 | [X]Men & behav dis due alcohol: withdrawl state with delirium | 64101 |
| Eu10411 | [X]Delirium tremens, alcohol induced                          | 17259 |
| Eu10500 | [X]Mental & behav dis due to use alcohol: psychotic disorder  | 12353 |
| Eu10511 | [X]Alcoholic hallucinosis                                     | 6467  |
| Eu10512 | [X]Alcoholic jealousy                                         | 65932 |



|         |                                                                |        |
|---------|----------------------------------------------------------------|--------|
| Eu10513 | [X]Alcoholic paranoia                                          | 30162  |
| Eu10514 | [X]Alcoholic psychosis NOS                                     | 17607  |
| Eu11400 | [X]Men & behav dis due opioid: withdrawl state with delirium   | 97488  |
| Eu11500 | [X]Mental & behav dis due to use opioids: psychotic disorder   | 50964  |
| Eu12500 | [X]Mental & behav dis due to cannabinoids: psychotic disorder  | 38429  |
| Eu13400 | [X]Men & beh dis due sed/hypns: withdrawl state wth delirium   | 44131  |
| Eu13500 | [X]Mental & behav dis due to sed/hypntcs: psychotic disorder   | 69138  |
| Eu14500 | [X]Mental & behav dis due to use cocaine: psychotic disorder   | 49565  |
| Eu15500 | [X]Mental/behav dis oth stims inc caffeine: psychotic dis      | 49879  |
| Eu16500 | [X]Mental & behav dis due to hallucinogens: psychotic disorder | 54983  |
| Eu18400 | [X]Men & beh dis vol solvents: withdrawal state wth delirium   | 62106  |
| Eu18500 | [X]Mental & behav dis due to vol solvents: psychotic disorder  | 98618  |
| Eu19400 | [X]Mnt/bh dis mlti drg use/oth psy sbs: wthdr state + dlrium   | 65950  |
| Eu19500 | [X]Ment/behav dis mlti drug use/oth psyc sbs: psychotc dis     | 24637  |
| Eu1A500 | [X]Mental behav disorder due crack cocaine: psychotic disorder | 102475 |
| Eu23.00 | [X]Acute and transient psychotic disorders                     | 25019  |
| Eu23000 | [X]Acute polymorphic psychot disorder without symp of schizop  | 36720  |
| Eu23011 | [X]Bouffee delirante                                           | 50023  |
| Eu23012 | [X]Cycloid psychosis                                           | 21455  |
| Eu23100 | [X]Acute polymorphic psychot disorder with symp of schizophren | 21595  |
| Eu23112 | [X]Cycloid psychosis with symptoms of schizophrenia            | 26143  |
| Eu23200 | [X]Acute schizophrenia-like psychotic disorder                 | 11778  |
| Eu23211 | [X]Brief schizophreniform disorder                             | 59096  |
| Eu23212 | [X]Brief schizophrenifrm psych                                 | 70884  |
| Eu23214 | [X]Schizophrenic reaction                                      | 94604  |
| Eu23300 | [X]Other acute predominantly delusional psychotic disorders    | 44307  |
| Eu23312 | [X]Psychogenic paranoid psychosis                              | 27770  |
| Eu23y00 | [X]Other acute and transient psychotic disorders               | 44503  |
| Eu23z00 | [X]Acute and transient psychotic disorder, unspecified         | 34168  |
| Eu23z11 | [X]Brief reactive psychosis NOS                                | 31707  |
| Eu23z12 | [X]Reactive psychosis                                          | 29651  |
| Eu24.00 | [X]Induced delusional disorder                                 | 51302  |
| Eu24.12 | [X]Induced paranoid disorder                                   | 47230  |
| Eu24.13 | [X]Induced psychotic disorder                                  | 11973  |
| R001.00 | [D]Hallucinations                                              | 2455   |
| R001000 | [D]Hallucinations, auditory                                    | 12120  |
| R001100 | [D]Hallucinations, gustatory                                   | 53990  |
| R001200 | [D]Hallucinations, olfactory                                   | 25283  |
| R001300 | [D]Hallucinations, tactile                                     | 64131  |
| R001400 | [D]Visual hallucinations                                       | 12064  |
| R001z00 | [D]Hallucinations NOS                                          | 19916  |

Table C. Antipsychotic drug codes

| prodcode | Description                                                                           | Drug substance                              |
|----------|---------------------------------------------------------------------------------------|---------------------------------------------|
| 4876     | Amisulpride 50mg tablets                                                              | Amisulpride                                 |
| 4992     | Solian 200 tablets (Sanofi)                                                           | Amisulpride                                 |
| 5071     | Amisulpride 200mg tablets                                                             | Amisulpride                                 |
| 5927     | Amisulpride 400mg tablets                                                             | Amisulpride                                 |
| 6109     | Solian 400 tablets (Sanofi)                                                           | Amisulpride                                 |
| 6482     | Amisulpride 100mg/ml oral solution sugar free                                         | Amisulpride                                 |
| 6524     | Amisulpride 100mg tablets                                                             | Amisulpride                                 |
| 11938    | Amisulpride 25mg/5ml oral suspension                                                  | Amisulpride                                 |
| 16768    | Solian 50 tablets (Sanofi)                                                            | Amisulpride                                 |
| 26544    | Solian 100 tablets (Sanofi)                                                           | Amisulpride                                 |
| 31576    | Solian 100mg/ml oral solution (Sanofi)                                                | Amisulpride                                 |
| 34927    | Amisulpride 200mg tablets (Zentiva)                                                   | Amisulpride                                 |
| 41702    | Amisulpride 100mg tablets (Zentiva)                                                   | Amisulpride                                 |
| 41714    | Amisulpride 50mg tablets (Zentiva)                                                    | Amisulpride                                 |
| 46889    | Amisulpride 25mg/5ml oral solution                                                    | Amisulpride                                 |
| 46969    | Amisulpride 200mg tablets (A A H Pharmaceuticals Ltd)                                 | Amisulpride                                 |
| 55625    | Amisulpride 50mg/5ml oral suspension                                                  | Amisulpride                                 |
| 6894     | Perphenazine 2mg with Amitriptyline 25mg tablet                                       | Amitriptyline<br>Hydrochloride              |
| 16323    | Perphenazine 2mg with Amitriptyline 10mg tablet                                       | Amitriptyline<br>Hydrochloride              |
| 1453     | Triptafen m 2mg+10mg Tablet (Goldshield Pharmaceuticals Ltd)                          | Amitriptyline<br>hydrochloride/Perphenazine |
| 6561     | Aripiprazole 10mg tablets                                                             | Aripiprazole                                |
| 6573     | Aripiprazole 15mg tablets                                                             | Aripiprazole                                |
| 14344    | Aripiprazole 5mg tablets                                                              | Aripiprazole                                |
| 14858    | Abilify 15mg tablets (Otsuka Pharmaceuticals (U.K.) Ltd)                              | Aripiprazole                                |
| 16561    | Aripiprazole 30mg tablets                                                             | Aripiprazole                                |
| 16575    | Aripiprazole 1mg/ml oral solution                                                     | Aripiprazole                                |
| 18132    | Abilify 5mg tablets (Otsuka Pharmaceuticals (U.K.) Ltd)                               | Aripiprazole                                |
| 24358    | Abilify 10mg tablets (Otsuka Pharmaceuticals (U.K.) Ltd)                              | Aripiprazole                                |
| 29879    | Abilify 30mg tablets (Otsuka Pharmaceuticals (U.K.) Ltd)                              | Aripiprazole                                |
| 31098    | Aripiprazole 15mg orodispersible tablets sugar free                                   | Aripiprazole                                |
| 32076    | Aripiprazole 10mg orodispersible tablets sugar free                                   | Aripiprazole                                |
| 37606    | Abilify 10mg orodispersible tablets (Otsuka Pharmaceuticals (U.K.) Ltd)               | Aripiprazole                                |
| 38010    | Abilify 15mg orodispersible tablets (Otsuka Pharmaceuticals (U.K.) Ltd)               | Aripiprazole                                |
| 38080    | Abilify 1mg/ml oral solution (Otsuka Pharmaceuticals (U.K.) Ltd)                      | Aripiprazole                                |
| 38375    | Aripiprazole 9.75mg/1.3ml solution for injection vials                                | Aripiprazole                                |
| 46705    | Abilify 9.75mg/1.3ml solution for injection vials (Otsuka Pharmaceuticals (U.K.) Ltd) | Aripiprazole                                |

|       |                                                             |                              |
|-------|-------------------------------------------------------------|------------------------------|
| 49699 | Abilify 5mg tablets (Sigma Pharmaceuticals Plc)             | Aripiprazole                 |
| 57114 | Abilify 5mg tablets (Mawdsley-Brooks & Company Ltd)         | Aripiprazole                 |
| 47167 | Asenapine 10mg sublingual tablets sugar free                | Asenapine                    |
| 47280 | Asenapine 5mg sublingual tablets sugar free                 | Asenapine                    |
| 2540  | Benperidol 250microgram tablets                             | Benperidol                   |
| 21744 | Anquil 250microgram Tablet (Concord Pharmaceuticals Ltd)    | Benperidol                   |
| 31796 | Benquil 250microgram tablets (Concord Pharmaceuticals Ltd)  | Benperidol                   |
| 47365 | Anquil 250microgram tablets (Archimedes Pharma UK Ltd)      | Benperidol                   |
| 15418 | Largactil forte 100mg/5ml Oral suspension (Hawgreen Ltd)    | Chlorpromazine embonate      |
| 588   | Chlorpromazine 25mg tablets                                 | Chlorpromazine hydrochloride |
| 2154  | Chlorpromazine 100mg tablets                                | Chlorpromazine hydrochloride |
| 2814  | Largactil 25mg Tablet (Hawgreen Ltd)                        | Chlorpromazine hydrochloride |
| 3348  | Chlorpromazine 50mg tablets                                 | Chlorpromazine hydrochloride |
| 3772  | Largactil 50mg Tablet (Hawgreen Ltd)                        | Chlorpromazine hydrochloride |
| 3952  | Chlorpromazine 25mg/5ml oral solution                       | Chlorpromazine hydrochloride |
| 4434  | Chlorpromazine 50mg/5ml oral solution                       | Chlorpromazine hydrochloride |
| 7493  | Largactil 100mg Tablet (Hawgreen Ltd)                       | Chlorpromazine hydrochloride |
| 7514  | Largactil 50mg/2ml solution for injection ampoules (Sanofi) | Chlorpromazine hydrochloride |
| 8311  | Chlorpromazine 25mg/ml injection                            | Chlorpromazine Hydrochloride |
| 8506  | Chlorpromazine 100mg suppository                            | Chlorpromazine Hydrochloride |
| 8519  | Chlorpromazine 100mg/5ml oral solution                      | Chlorpromazine hydrochloride |
| 8771  | Largactil 10mg Tablet (Hawgreen Ltd)                        | Chlorpromazine hydrochloride |
| 9190  | Chlorpromazine 25mg/5ml oral solution sugar free            | Chlorpromazine hydrochloride |
| 10434 | Largactil 25mg/5ml Oral solution (Hawgreen Ltd)             | Chlorpromazine hydrochloride |
| 17227 | Chloractil 25mg Tablet (DDSA Pharmaceuticals Ltd)           | Chlorpromazine hydrochloride |
| 19002 | Largactil 100mg Suppository (Rhone-Poulenc Rorer Ltd)       | Chlorpromazine Hydrochloride |
| 22606 | Chlorpromazine 25mg/1ml solution for injection ampoules     | Chlorpromazine hydrochloride |
| 25653 | Chloractil 50mg Tablet (DDSA Pharmaceuticals Ltd)           | Chlorpromazine hydrochloride |
| 28862 | Chloractil 100mg Tablet (DDSA Pharmaceuticals Ltd)          | Chlorpromazine               |

|       |                                                                       |                              |
|-------|-----------------------------------------------------------------------|------------------------------|
|       |                                                                       | hydrochloride                |
| 31171 | Chlorpromazine 50mg tablets (A A H Pharmaceuticals Ltd)               | Chlorpromazine hydrochloride |
| 31172 | Chlorpromazine 50mg tablets (Teva UK Ltd)                             | Chlorpromazine hydrochloride |
| 31175 | Chlorpromazine 25mg tablets (A A H Pharmaceuticals Ltd)               | Chlorpromazine hydrochloride |
| 31184 | Chlorpromazine 25mg tablets (IVAX Pharmaceuticals UK Ltd)             | Chlorpromazine hydrochloride |
| 34630 | Chlorpromazine 50mg tablets (Thornton & Ross Ltd)                     | Chlorpromazine hydrochloride |
| 34668 | Chlorpromazine 25mg tablets (Teva UK Ltd)                             | Chlorpromazine hydrochloride |
| 34693 | Chlorpromazine 25mg tablets (Thornton & Ross Ltd)                     | Chlorpromazine hydrochloride |
| 34736 | Chlorpromazine 100mg tablets (Teva UK Ltd)                            | Chlorpromazine hydrochloride |
| 35929 | Chlorpromazine 50mg/2ml solution for injection ampoules               | Chlorpromazine hydrochloride |
| 37705 | Chlorpromazine 100mg/5ml suspension                                   | Chlorpromazine Hydrochloride |
| 37871 | Chlorpromazine 25mg/5ml Oral solution (Rosemont Pharmaceuticals Ltd)  | Chlorpromazine hydrochloride |
| 41645 | Chlorpromazine 25mg/ml Injection (Antigen Pharmaceuticals)            | Chlorpromazine Hydrochloride |
| 44186 | Chlorpromazine 25mg/5ml oral solution (A A H Pharmaceuticals Ltd)     | Chlorpromazine hydrochloride |
| 45281 | Chlorpromazine 100mg/5ml oral solution (Rosemont Pharmaceuticals Ltd) | Chlorpromazine hydrochloride |
| 46960 | Chlorpromazine 100mg tablets (IVAX Pharmaceuticals UK Ltd)            | Chlorpromazine hydrochloride |
| 55011 | Largactil 25mg tablets (Sanofi)                                       | Chlorpromazine hydrochloride |
| 56862 | Chlorpromazine 25mg/5ml syrup (Rosemont Pharmaceuticals Ltd)          | Chlorpromazine hydrochloride |
| 57550 | Largactil 25mg/5ml syrup (Sanofi)                                     | Chlorpromazine hydrochloride |
| 58492 | Chlorpromazine 100mg tablets (Waymade Healthcare Plc)                 | Chlorpromazine hydrochloride |
| 58702 | Largactil 100mg tablets (Sanofi)                                      | Chlorpromazine hydrochloride |
| 58703 | Largactil 50mg tablets (Sanofi)                                       | Chlorpromazine hydrochloride |
| 28147 | Taractan 15mg Tablet (Roche Products Ltd)                             | Chlorprothixene              |
| 30111 | Chlorprothixene 50mg tablets                                          | Chlorprothixene              |
| 8046  | Clozapine 25mg tablets                                                | Clozapine                    |
| 8047  | Clozapine 100mg tablets                                               | Clozapine                    |
| 14112 | Clozaril 100mg tablets (Novartis Pharmaceuticals UK Ltd)              | Clozapine                    |
| 17958 | Clozaril 25mg tablets (Novartis Pharmaceuticals UK Ltd)               | Clozapine                    |
| 21199 | Denzapine 100mg tablets (Britannia Pharmaceuticals Ltd)               | Clozapine                    |

|       |                                                                             |                             |
|-------|-----------------------------------------------------------------------------|-----------------------------|
| 30487 | Denzapine 25mg tablets (Britannia Pharmaceuticals Ltd)                      | Clozapine                   |
| 40586 | Clozapine 50mg tablets                                                      | Clozapine                   |
| 40587 | Clozapine 200mg tablets                                                     | Clozapine                   |
| 41070 | Denzapine 50mg tablets (Britannia Pharmaceuticals Ltd)                      | Clozapine                   |
| 41428 | Denzapine 200mg tablets (Britannia Pharmaceuticals Ltd)                     | Clozapine                   |
| 42242 | Clozapine 50mg/ml oral suspension sugar free                                | Clozapine                   |
| 45444 | Denzapine 50mg/ml oral suspension (Britannia Pharmaceuticals Ltd)           | Clozapine                   |
| 47233 | Zaponex 25mg tablets (Teva UK Ltd)                                          | Clozapine                   |
| 47302 | Zaponex 100mg tablets (Teva UK Ltd)                                         | Clozapine                   |
| 3773  | Droperidol 10mg tablets                                                     | Droperidol                  |
| 13369 | Droleptan 1mg/ml Oral solution (Janssen-Cilag Ltd)                          | Droperidol                  |
| 15128 | Droperidol 1mg/ml liquid                                                    | Droperidol                  |
| 15171 | Droleptan 10mg Tablet (Janssen-Cilag Ltd)                                   | Droperidol                  |
| 21125 | Droleptan 5mg/ml Injection (Janssen-Cilag Ltd)                              | Droperidol                  |
| 22609 | Droperidol 5mg/ml injection                                                 | Droperidol                  |
| 42229 | Droperidol oral liquid                                                      | Droperidol                  |
| 53634 | Droperidol capsules                                                         | Droperidol                  |
| 1733  | Flupentixol decanoate 20mg/ml Injection                                     | Flupentixol Decanoate       |
| 2136  | Depixol 20mg/ml Injection (Lundbeck Ltd)                                    | Flupentixol Decanoate       |
| 2155  | Depixol -conc 100mg/ml Injection (Lundbeck Ltd)                             | Flupentixol Decanoate       |
| 2156  | Depixol 40mg/2ml solution for injection ampoules (Lundbeck Ltd)             | Flupentixol decanoate       |
| 2276  | Flupentixol 40mg/2ml solution for injection ampoules                        | Flupentixol decanoate       |
| 8712  | Flupentixol decanoate 100mg/ml Injection                                    | Flupentixol Decanoate       |
| 14130 | Depixol Low Volume 200mg/1ml solution for injection ampoules (Lundbeck Ltd) | Flupentixol decanoate       |
| 14839 | Flupentixol 200mg/1ml solution for injection ampoules                       | Flupentixol decanoate       |
| 14889 | Depixol Conc 100mg/1ml solution for injection ampoules (Lundbeck Ltd)       | Flupentixol decanoate       |
| 14966 | Flupentixol 20mg/1ml solution for injection ampoules                        | Flupentixol decanoate       |
| 18155 | Flupentixol 50mg/0.5ml solution for injection ampoules                      | Flupentixol decanoate       |
| 18175 | Flupentixol 100mg/1ml solution for injection ampoules                       | Flupentixol decanoate       |
| 18197 | Depixol Conc 50mg/0.5ml solution for injection ampoules (Lundbeck Ltd)      | Flupentixol decanoate       |
| 19283 | Depixol 20mg/1ml solution for injection ampoules (Lundbeck Ltd)             | Flupentixol decanoate       |
| 57170 | Psytixol 100mg/1ml solution for injection ampoules (Generics (UK) Ltd)      | Flupentixol decanoate       |
| 57762 | Psytixol 40mg/2ml solution for injection ampoules (Generics (UK) Ltd)       | Flupentixol decanoate       |
| 59816 | Psytixol 50mg/0.5ml solution for injection ampoules (Generics (UK) Ltd)     | Flupentixol decanoate       |
| 5707  | Flupentixol 3mg tablets                                                     | Flupentixol dihydrochloride |
| 5712  | Depixol 3mg tablets (Lundbeck Ltd)                                          | Flupentixol dihydrochloride |
| 55620 | Flupentixol Liquid                                                          | Flupentixol                 |

|       |                                                                                  |                            |
|-------|----------------------------------------------------------------------------------|----------------------------|
|       |                                                                                  | Dihydrochloride            |
| 3926  | Modecate 25mg/ml Injection (Sanofi-Synthelabo Ltd)                               | Fluphenazine Decanoate     |
| 9022  | Fluphenazine decanoate 25mg/ml Injection                                         | Fluphenazine Decanoate     |
| 10514 | Fluphenazine decanoate 100mg/ml Injection                                        | Fluphenazine Decanoate     |
| 12128 | Modecate concentrate 100mg/ml Injection (Sanofi-Synthelabo Ltd)                  | Fluphenazine Decanoate     |
| 33780 | Modecate 25mg/1ml solution for injection ampoules (Sanofi)                       | Fluphenazine decanoate     |
| 35065 | Fluphenazine decanoate 25mg/1ml solution for injection ampoules                  | Fluphenazine decanoate     |
| 35122 | Modecate 12.5mg/0.5ml solution for injection ampoules (Sanofi)                   | Fluphenazine decanoate     |
| 35176 | Fluphenazine decanoate 100mg/1ml solution for injection ampoules                 | Fluphenazine decanoate     |
| 35391 | Fluphenazine decanoate 50mg/0.5ml solution for injection ampoules                | Fluphenazine decanoate     |
| 35445 | Modecate 50mg/2ml solution for injection ampoules (Sanofi)                       | Fluphenazine decanoate     |
| 35455 | Modecate Concentrate 100mg/1ml solution for injection ampoules (Sanofi)          | Fluphenazine decanoate     |
| 35487 | Modecate Concentrate 50mg/0.5ml solution for injection ampoules (Sanofi)         | Fluphenazine decanoate     |
| 35530 | Fluphenazine decanoate 12.5mg/0.5ml solution for injection ampoules              | Fluphenazine decanoate     |
| 35723 | Fluphenazine decanoate 50mg/2ml solution for injection ampoules                  | Fluphenazine decanoate     |
| 41970 | Fluphenazine decanoate 25mg/1ml solution for injection ampoules (Hospira UK Ltd) | Fluphenazine decanoate     |
| 41971 | Fluphenazine decanoate 25mg/ml Injection (Antigen Pharmaceuticals)               | Fluphenazine decanoate     |
| 17190 | Fluphenazine enanthate 25mg/ml Injection                                         | Fluphenazine Enantate      |
| 25835 | Moditen enanthate 25mg/ml Injection (Sanofi-Synthelabo Ltd)                      | Fluphenazine Enantate      |
| 5212  | Fluphenazine 1mg tablets                                                         | Fluphenazine hydrochloride |
| 5597  | Moditen 1mg tablets (Sanofi)                                                     | Fluphenazine hydrochloride |
| 329   | Haloperidol 1.5mg tablets                                                        | Haloperidol                |
| 475   | Haloperidol 10mg tablets                                                         | Haloperidol                |
| 2419  | Haloperidol 500microgram capsules                                                | Haloperidol                |
| 2620  | Haloperidol 1mg/ml Oral solution                                                 | Haloperidol                |
| 2621  | Haloperidol 5mg tablets                                                          | Haloperidol                |
| 3233  | Haloperidol 2mg/ml sugar free Liquid                                             | Haloperidol                |
| 4234  | Haloperidol 5mg/ml Injection                                                     | Haloperidol                |
| 5192  | Haloperidol 1mg/5ml sugar free Oral solution                                     | Haloperidol                |
| 5545  | Serenace 500microgram capsules (Teva UK Ltd)                                     | Haloperidol                |
| 6134  | Dozic 5mg/5ml oral solution (Rosemont Pharmaceuticals Ltd)                       | Haloperidol                |
| 6523  | Haldol 5mg/ml Injection (Janssen-Cilag Ltd)                                      | Haloperidol                |

|       |                                                                                |             |
|-------|--------------------------------------------------------------------------------|-------------|
| 7436  | Serenace 5mg/1ml solution for injection ampoules (IVAX Pharmaceuticals UK Ltd) | Haloperidol |
| 8153  | Serenace 2mg/ml liquid (Teva UK Ltd)                                           | Haloperidol |
| 8979  | Serenace 1.5mg tablets (Teva UK Ltd)                                           | Haloperidol |
| 9975  | Haloperidol 1mg/ml sugar free Oral solution                                    | Haloperidol |
| 10435 | Haloperidol 10mg/ml Oral solution                                              | Haloperidol |
| 11213 | Haloperidol 2mg/5ml sugar free Oral solution                                   | Haloperidol |
| 12387 | Haloperidol 20mg tablets                                                       | Haloperidol |
| 12921 | Haldol 2mg/ml oral solution (Janssen-Cilag Ltd)                                | Haloperidol |
| 13105 | Haloperidol 2mg/ml Oral solution                                               | Haloperidol |
| 13338 | Serenace 5mg tablets (Teva UK Ltd)                                             | Haloperidol |
| 13483 | Serenace 20mg tablets (Teva UK Ltd)                                            | Haloperidol |
| 13484 | Serenace 10mg tablets (Teva UK Ltd)                                            | Haloperidol |
| 17379 | Haloperidol 1.5mg/5ml sugar free Oral solution                                 | Haloperidol |
| 22660 | Haldol 5mg tablets (Janssen-Cilag Ltd)                                         | Haloperidol |
| 23678 | Haldol 10mg tablets (Janssen-Cilag Ltd)                                        | Haloperidol |
| 24494 | Haldol 10mg/ml Liquid (Janssen-Cilag Ltd)                                      | Haloperidol |
| 28679 | Dozic 2mg/ml Oral solution (Rosemont Pharmaceuticals Ltd)                      | Haloperidol |
| 32051 | Haloperidol 5mg Tablet (Generics (UK) Ltd)                                     | Haloperidol |
| 32838 | Haloperidol 1.5mg tablets (IVAX Pharmaceuticals UK Ltd)                        | Haloperidol |
| 34039 | Haloperidol 1mg/ml Liquid (Rosemont Pharmaceuticals Ltd)                       | Haloperidol |
| 34272 | Haloperidol 5mg/ml Injection (Antigen Pharmaceuticals)                         | Haloperidol |
| 34339 | Haloperidol 1.5mg tablets (A A H Pharmaceuticals Ltd)                          | Haloperidol |
| 34903 | Haloperidol 5mg tablets (IVAX Pharmaceuticals UK Ltd)                          | Haloperidol |
| 36771 | Haloperidol 250micrograms/5ml oral suspension                                  | Haloperidol |
| 38262 | Haloperidol 5mg/1ml solution for injection ampoules                            | Haloperidol |
| 38540 | Haldol 5mg/1ml solution for injection ampoules (Janssen-Cilag Ltd)             | Haloperidol |
| 41546 | Haloperidol 1mg/ml Liquid (Hillcross Pharmaceuticals Ltd)                      | Haloperidol |
| 42000 | Haloperidol 2mg/ml Liquid (Rosemont Pharmaceuticals Ltd)                       | Haloperidol |
| 42807 | Haloperidol 500microgram Tablet (Lagap)                                        | Haloperidol |
| 42895 | Haloperidol 5mg tablets (Teva UK Ltd)                                          | Haloperidol |
| 43020 | Haloperidol Oral solution                                                      | Haloperidol |
| 43520 | Haloperidol 1.5mg tablets (Teva UK Ltd)                                        | Haloperidol |
| 45810 | Haloperidol 10mg/5ml oral solution sugar free                                  | Haloperidol |
| 45880 | Haloperidol 5mg/5ml oral solution sugar free                                   | Haloperidol |
| 47013 | Haloperidol 1mg/5ml oral suspension                                            | Haloperidol |
| 47149 | Haloperidol 1mg/5ml oral solution                                              | Haloperidol |
| 47808 | Haloperidol 10mg/5ml oral solution sugar free (A A H Pharmaceuticals Ltd)      | Haloperidol |
| 49207 | Haloperidol 2mg/5ml oral solution                                              | Haloperidol |
| 53649 | Haloperidol 2mg/5ml oral suspension                                            | Haloperidol |
| 55848 | Haloperidol 5mg/1ml solution for injection ampoules (AMCo)                     | Haloperidol |

|       |                                                                                |                               |
|-------|--------------------------------------------------------------------------------|-------------------------------|
| 55871 | Haloperidol 2mg/ml Liquid (Hillcross Pharmaceuticals Ltd)                      | Haloperidol                   |
| 2094  | Haldol decanoate 50mg/1ml solution for injection ampoules (Janssen-Cilag Ltd)  | Haloperidol decanoate         |
| 10565 | Haloperidol decanoate 50mg/1ml solution for injection ampoules                 | Haloperidol decanoate         |
| 12386 | Haldol decanoate 100mg/1ml solution for injection ampoules (Janssen-Cilag Ltd) | Haloperidol decanoate         |
| 15814 | Haloperidol decanoate 100mg/1ml solution for injection ampoules                | Haloperidol decanoate         |
| 8445  | Stelabid Tablet (GlaxoSmithKline Consumer Healthcare)                          | Isopropamide Iodide           |
| 4442  | Nozinan 25mg/1ml solution for injection ampoules (Sanofi)                      | Levomepromazine hydrochloride |
| 6064  | Levomepromazine 25mg/1ml solution for injection ampoules                       | Levomepromazine hydrochloride |
| 52846 | Nozinan 25mg/1ml solution for injection ampoules (Lexon (UK) Ltd)              | Levomepromazine hydrochloride |
| 59938 | Levomepromazine 25mg/1ml solution for injection ampoules (Wockhardt UK Ltd)    | Levomepromazine hydrochloride |
| 4232  | Nozinan 25mg tablets (Sanofi)                                                  | Levomepromazine maleate       |
| 5014  | Levomepromazine 25mg tablets                                                   | Levomepromazine maleate       |
| 7390  | Levomepromazine 6mg tablets                                                    | Levomepromazine maleate       |
| 21339 | Veractil 25mg Tablet (Rhone-Poulenc Rorer Ltd)                                 | Levomepromazine maleate       |
| 28231 | Levinan 6mg Tablet (Link Pharmaceuticals Ltd)                                  | Levomepromazine maleate       |
| 40782 | Levomepromazine 6mg Tablet                                                     | Levomepromazine Maleate       |
| 49606 | Levinan 6mg tablets (Archimedes Pharma UK Ltd)                                 | Levomepromazine maleate       |
| 53951 | Levomepromazine 6.25mg/5ml oral solution                                       | Levomepromazine maleate       |
| 60250 | Levomepromazine 3mg/5ml oral solution                                          | Levomepromazine maleate       |
| 1249  | Olanzapine 10mg tablets                                                        | Olanzapine                    |
| 2656  | Olanzapine 2.5mg tablets                                                       | Olanzapine                    |
| 3281  | Olanzapine 5mg tablets                                                         | Olanzapine                    |
| 5653  | Olanzapine 7.5mg tablets                                                       | Olanzapine                    |
| 6023  | Olanzapine 10mg Orodispersible tablet                                          | Olanzapine                    |
| 6412  | Olanzapine 5mg Orodispersible tablet                                           | Olanzapine                    |
| 6838  | Olanzapine 15mg Orodispersible tablet                                          | Olanzapine                    |
| 6850  | Olanzapine 15mg tablets                                                        | Olanzapine                    |
| 13820 | Zyprexa 10mg tablets (Eli Lilly and Company Ltd)                               | Olanzapine                    |
| 13888 | Zyprexa 10mg Velotabs (Eli Lilly and Company Ltd)                              | Olanzapine                    |
| 14717 | Zyprexa 5mg Velotabs (Eli Lilly and Company Ltd)                               | Olanzapine                    |
| 16103 | Olanzapine 20mg Orodispersible tablet                                          | Olanzapine                    |
| 16407 | Zyprexa 15mg Velotabs (Eli Lilly and Company Ltd)                              | Olanzapine                    |



|       |                                                                                                   |                                 |
|-------|---------------------------------------------------------------------------------------------------|---------------------------------|
| 18024 | Zyprexa 5mg tablets (Eli Lilly and Company Ltd)                                                   | Olanzapine                      |
| 18453 | Zyprexa 2.5mg tablets (Eli Lilly and Company Ltd)                                                 | Olanzapine                      |
| 19976 | Zyprexa 15mg tablets (Eli Lilly and Company Ltd)                                                  | Olanzapine                      |
| 21964 | Zyprexa 7.5mg tablets (Eli Lilly and Company Ltd)                                                 | Olanzapine                      |
| 23431 | Olanzapine 10mg powder for solution for injection vials                                           | Olanzapine                      |
| 29540 | Olanzapine 20mg tablets                                                                           | Olanzapine                      |
| 33883 | Zyprexa 20mg Velotabs (Eli Lilly and Company Ltd)                                                 | Olanzapine                      |
| 36163 | Zyprexa 20mg tablets (Eli Lilly and Company Ltd)                                                  | Olanzapine                      |
| 45953 | Zyprexa 10mg powder for solution for injection vials (Eli Lilly and Company Ltd)                  | Olanzapine                      |
| 47049 | Olanzapine 10mg orodispersible tablets                                                            | Olanzapine                      |
| 47055 | Olanzapine 5mg orodispersible tablets                                                             | Olanzapine                      |
| 47063 | Olanzapine 10mg orodispersible tablets sugar free                                                 | Olanzapine                      |
| 47083 | Olanzapine 20mg orodispersible tablets                                                            | Olanzapine                      |
| 47093 | Olanzapine 20mg orodispersible tablets sugar free                                                 | Olanzapine                      |
| 47098 | Olanzapine 5mg orodispersible tablets sugar free                                                  | Olanzapine                      |
| 47103 | Olanzapine 15mg orodispersible tablets sugar free                                                 | Olanzapine                      |
| 47152 | Olanzapine 15mg orodispersible tablets                                                            | Olanzapine                      |
| 47256 | Olanzapine 5mg oral lyophilisates sugar free                                                      | Olanzapine                      |
| 47304 | Olanzapine 10mg oral lyophilisates sugar free                                                     | Olanzapine                      |
| 47394 | Olanzapine 15mg oral lyophilisates sugar free                                                     | Olanzapine                      |
| 47498 | Olanzapine 20mg oral lyophilisates sugar free                                                     | Olanzapine                      |
| 52001 | Olanzapine 2.5mg tablets (Aspire Pharma Ltd)                                                      | Olanzapine                      |
| 53556 | Olanzapine 10mg oral lyophilisates sugar free                                                     | Olanzapine                      |
| 53848 | Zalasta 5mg orodispersible tablets (Consilient Health Ltd)                                        | Olanzapine                      |
| 55667 | Olanzapine 15mg tablets (Actavis UK Ltd)                                                          | Olanzapine                      |
| 56072 | Olanzapine 20mg orodispersible tablets                                                            | Olanzapine                      |
| 56265 | Olanzapine 20mg oral lyophilisates sugar free                                                     | Olanzapine                      |
| 57160 | Olanzapine 5mg oral lyophilisates sugar free                                                      | Olanzapine                      |
| 57270 | Olanzapine 2.5mg/5ml oral suspension                                                              | Olanzapine                      |
| 57616 | Olanzapine 20mg tablets (Teva UK Ltd)                                                             | Olanzapine                      |
| 58147 | Olanzapine 10mg tablets (Zentiva)                                                                 | Olanzapine                      |
| 58854 | Olanzapine 10mg tablets (Actavis UK Ltd)                                                          | Olanzapine                      |
| 59143 | Olanzapine 2.5mg tablets (Teva UK Ltd)                                                            | Olanzapine                      |
| 43914 | Olanzapine embonate 210mg powder and solvent for suspension for injection vials                   | Olanzapine embonate monohydrate |
| 46422 | Olanzapine embonate 300mg powder and solvent for suspension for injection vials                   | Olanzapine embonate monohydrate |
| 55268 | Zypadhera 300mg powder and solvent for suspension for injection vials (Eli Lilly and Company Ltd) | Olanzapine embonate monohydrate |
| 8921  | Integrin 10mg Capsule (Sanofi-Synthelabo Ltd)                                                     | Oxypertine                      |
| 27211 | Integrin 40mg Tablet (Sanofi-Synthelabo Ltd)                                                      | Oxypertine                      |
| 36116 | Paliperidone 6mg modified-release tablets                                                         | Paliperidone                    |
| 36954 | Invega 6mg modified-release tablets (Janssen-Cilag Ltd)                                           | Paliperidone                    |
| 37501 | Paliperidone 9mg modified-release tablets                                                         | Paliperidone                    |
| 37717 | Paliperidone 3mg modified-release tablets                                                         | Paliperidone                    |
| 46224 | Paliperidone 50mg/0.5ml suspension for injection pre-                                             | Paliperidone Palmitate          |

|       |                                                                                      |                         |
|-------|--------------------------------------------------------------------------------------|-------------------------|
|       | filled syringes                                                                      |                         |
| 46351 | Paliperidone 150mg/1.5ml suspension for injection pre-filled syringes                | Paliperidone Palmitate  |
| 46434 | Xeplion 100mg/1ml suspension for injection pre-filled syringes (Janssen-Cilag Ltd)   | Paliperidone Palmitate  |
| 46435 | Xeplion 150mg/1.5ml suspension for injection pre-filled syringes (Janssen-Cilag Ltd) | Paliperidone palmitate  |
| 46436 | Xeplion 75mg/0.75ml suspension for injection pre-filled syringes (Janssen-Cilag Ltd) | Paliperidone palmitate  |
| 46447 | Paliperidone 100mg/1ml suspension for injection pre-filled syringes                  | Paliperidone Palmitate  |
| 46556 | Paliperidone 75mg/0.75ml suspension for injection pre-filled syringes                | Paliperidone Palmitate  |
| 47162 | Xeplion 50mg/0.5ml suspension for injection pre-filled syringes (Janssen-Cilag Ltd)  | Paliperidone Palmitate  |
| 7833  | Neulactil 2.5mg Tablet (JHC Healthcare Ltd)                                          | Pericyazine             |
| 7834  | Pericyazine 2.5mg tablets                                                            | Pericyazine             |
| 8031  | Neulactil 10mg Tablet (JHC Healthcare Ltd)                                           | Pericyazine             |
| 8032  | Pericyazine 10mg tablets                                                             | Pericyazine             |
| 12195 | Pericyazine 10mg/5ml oral solution                                                   | Pericyazine             |
| 13902 | Neulactil Forte syrup (Sanofi)                                                       | Pericyazine             |
| 15472 | Pericyazine 25mg tablet                                                              | Pericyazine             |
| 21064 | Neulactil 25mg Tablet (JHC Healthcare Ltd)                                           | Pericyazine             |
| 39830 | Neulactil 2.5mg tablets (Sanofi)                                                     | Pericyazine             |
| 40881 | Neulactil 10mg tablets (Sanofi)                                                      | Pericyazine             |
| 228   | Fentazin 5mg/ml Injection (Goldshield Pharmaceuticals Ltd)                           | Perphenazine            |
| 609   | Perphenazine 2mg tablets                                                             | Perphenazine            |
| 840   | Fentazin 2mg tablets (AMCo)                                                          | Perphenazine            |
| 2157  | Perphenazine 4mg tablets                                                             | Perphenazine            |
| 7919  | Fentazin 4mg tablets (AMCo)                                                          | Perphenazine            |
| 14987 | Perphenazine 2mg/5ml oral solution sugar free                                        | Perphenazine            |
| 17087 | Perphenazine 5mg/ml injection                                                        | Perphenazine            |
| 25909 | Perphenazine 4mg/5ml Oral solution sugar free                                        | Perphenazine            |
| 5821  | Pimozide 4mg tablets                                                                 | Pimozide                |
| 8637  | Pimozide 10mg tablet                                                                 | Pimozide                |
| 15047 | Orap 4mg tablets (Janssen-Cilag Ltd)                                                 | Pimozide                |
| 27148 | Orap 10mg Tablet (Janssen-Cilag Ltd)                                                 | Pimozide                |
| 10944 | Pipotiazine palmitate 50mg/ml depot injection                                        | Pipotiazine Palmitate   |
| 12340 | Piportil 50mg/ml Depot injection (JHC Healthcare Ltd)                                | Pipotiazine Palmitate   |
| 35235 | Piportil Depot 50mg/1ml solution for injection ampoules (Sanofi)                     | Pipotiazine palmitate   |
| 35488 | Piportil Depot 100mg/2ml solution for injection ampoules (Sanofi)                    | Pipotiazine palmitate   |
| 35684 | Pipotiazine 50mg/1ml solution for injection ampoules                                 | Pipotiazine palmitate   |
| 36394 | Pipotiazine 100mg/2ml solution for injection ampoules                                | Pipotiazine palmitate   |
| 2972  | Promazine 25mg tablets                                                               | Promazine hydrochloride |
| 3197  | Promazine 100mg tablet                                                               | Promazine Hydrochloride |

|       |                                                          |                         |
|-------|----------------------------------------------------------|-------------------------|
| 3226  | Sparine 50mg Tablet (Wyeth Pharmaceuticals)              | Promazine hydrochloride |
| 3227  | Sparine 50mg/5ml Liquid (Wyeth Pharmaceuticals)          | Promazine Hydrochloride |
| 3228  | Promazine 50mg tablets                                   | Promazine hydrochloride |
| 6443  | Promazine 25mg/5ml oral solution                         | Promazine hydrochloride |
| 10780 | Promazine 50mg/5ml oral solution                         | Promazine Hydrochloride |
| 12193 | Sparine 25mg Tablet (Wyeth Pharmaceuticals)              | Promazine hydrochloride |
| 13311 | Sparine 50mg/ml Injection (Wyeth Pharmaceuticals)        | Promazine Hydrochloride |
| 14610 | Promazine 50mg/5ml oral solution sugar free              | Promazine Hydrochloride |
| 15161 | Promazine 50mg/ml injection                              | Promazine Hydrochloride |
| 15395 | Promazine 12.5mg/5ml oral solution                       | Promazine Hydrochloride |
| 17634 | Promazine 50mg/5ml oral solution                         | Promazine hydrochloride |
| 33493 | Sparine 100mg Tablet (Wyeth Pharmaceuticals)             | Promazine Hydrochloride |
| 38089 | Promazine 50mg/5ml syrup (Rosemont Pharmaceuticals Ltd)  | Promazine hydrochloride |
| 40390 | Promazine 25mg/5ml syrup (Rosemont Pharmaceuticals Ltd)  | Promazine hydrochloride |
| 41732 | Promazine 50mg tablets (Teva UK Ltd)                     | Promazine hydrochloride |
| 41995 | Promazine 50mg/ml Injection (Genus Pharmaceuticals Ltd)  | Promazine Hydrochloride |
| 43654 | Promazine 50mg/ml injection                              | Promazine Hydrochloride |
| 46945 | Promazine 25mg Tablet (Biorex Laboratories Ltd)          | Promazine hydrochloride |
| 55890 | Promazine 50mg/5ml Liquid (Rosemont Pharmaceuticals Ltd) | Promazine Hydrochloride |
| 60450 | Promazine 25mg tablets (A A H Pharmaceuticals Ltd)       | Promazine hydrochloride |
| 5039  | Quetiapine 100mg tablets                                 | Quetiapine fumarate     |
| 5040  | Quetiapine 150mg tablets                                 | Quetiapine fumarate     |
| 5283  | Quetiapine 25mg tablets                                  | Quetiapine fumarate     |
| 6864  | Seroquel 200mg tablets (AstraZeneca UK Ltd)              | Quetiapine fumarate     |
| 7039  | Quetiapine 300mg tablets                                 | Quetiapine fumarate     |
| 9794  | Quetiapine 200mg tablets                                 | Quetiapine fumarate     |
| 10107 | Quetiapine Starter Pack                                  | Quetiapine Fumarate     |
| 14813 | Seroquel 150mg tablets (AstraZeneca UK Ltd)              | Quetiapine fumarate     |
| 14859 | Seroquel 25mg tablets (AstraZeneca UK Ltd)               | Quetiapine fumarate     |
| 18013 | Seroquel 100mg tablets (AstraZeneca UK Ltd)              | Quetiapine fumarate     |
| 21709 | Seroquel 300mg tablets (AstraZeneca UK Ltd)              | Quetiapine fumarate     |
| 38840 | Quetiapine 400mg modified-release tablets                | Quetiapine fumarate     |
| 38885 | Quetiapine 50mg modified-release tablets                 | Quetiapine Fumarate     |
| 38906 | Quetiapine 300mg modified-release tablets                | Quetiapine fumarate     |
| 38912 | Quetiapine 200mg modified-release tablets                | Quetiapine fumarate     |
| 38913 | Seroquel XL 50mg tablets (AstraZeneca UK Ltd)            | Quetiapine Fumarate     |
| 38914 | Seroquel XL 200mg tablets (AstraZeneca UK Ltd)           | Quetiapine fumarate     |
| 38937 | Seroquel XL 300mg tablets (AstraZeneca UK Ltd)           | Quetiapine fumarate     |
| 39237 | Seroquel XL 400mg tablets (AstraZeneca UK Ltd)           | Quetiapine fumarate     |
| 40779 | Quetiapine 100mg/5ml oral solution                       | Quetiapine fumarate     |
| 40932 | Quetiapine 100mg/5ml oral suspension                     | Quetiapine fumarate     |
| 44024 | Quetiapine 150mg modified-release tablets                | Quetiapine Fumarate     |
| 44326 | Seroquel XL 150mg tablets (AstraZeneca UK Ltd)           | Quetiapine fumarate     |
| 45839 | Quetiapine 25mg/5ml oral suspension                      | Quetiapine fumarate     |

|       |                                                            |                                             |
|-------|------------------------------------------------------------|---------------------------------------------|
| 46764 | Quetiapine 12.5mg/5ml oral solution                        | Quetiapine Fumarate                         |
| 46871 | Quetiapine 12.5mg/5ml oral suspension                      | Quetiapine fumarate                         |
| 49696 | Quetiapine 25mg/5ml oral solution                          | Quetiapine fumarate                         |
| 51178 | Quetiapine 50mg/5ml oral suspension                        | Quetiapine fumarate                         |
| 53552 | Quetiapine 25mg tablets (Zentiva)                          | Quetiapine fumarate                         |
| 54483 | Sondate XL 300mg tablets (Teva UK Ltd)                     | Quetiapine fumarate                         |
| 55870 | Quetiapine oral liquid                                     | Quetiapine Fumarate                         |
| 56647 | Quetiapine 300mg tablets (Arrow Generics Ltd)              | Quetiapine fumarate                         |
| 57034 | Sondate XL 200mg tablets (Teva UK Ltd)                     | Quetiapine fumarate                         |
| 57412 | Sondate XL 400mg tablets (Teva UK Ltd)                     | Quetiapine fumarate                         |
| 57612 | Seroquel XL 400mg tablets (Lexon (UK) Ltd)                 | Quetiapine fumarate                         |
| 57613 | Seroquel XL 50mg tablets (Sigma Pharmaceuticals Plc)       | Quetiapine fumarate                         |
| 58821 | Quetiapine 25mg tablets (Dr Reddy's Laboratories (UK) Ltd) | Quetiapine fumarate                         |
| 58935 | Tenprolide XL 400mg tablets (Actavis UK Ltd)               | Quetiapine fumarate                         |
| 59215 | Quetiapine 150mg tablets (Ranbaxy (UK) Ltd)                | Quetiapine fumarate                         |
| 8881  | Remoxipride 150mg capsule                                  | Remoxipride<br>Hydrochloride<br>Monohydrate |
| 12445 | Remoxipride 300mg capsule                                  | Remoxipride<br>Hydrochloride<br>Monohydrate |
| 16223 | Roxiam 300mg Capsule (AstraZeneca UK Ltd)                  | Remoxipride<br>Hydrochloride<br>Monohydrate |
| 19016 | Roxiam 150mg Capsule (AstraZeneca UK Ltd)                  | Remoxipride<br>Hydrochloride<br>Monohydrate |
| 23034 | Remoxipride 75mg capsule                                   | Remoxipride<br>Hydrochloride<br>Monohydrate |
| 48077 | Roxiam ir 75mg Capsule (AstraZeneca UK Ltd)                | Remoxipride<br>Hydrochloride<br>Monohydrate |
| 302   | Risperidone 1mg/ml oral solution sugar free                | Risperidone                                 |
| 631   | Risperdal 500microgram tablets (Janssen-Cilag Ltd)         | Risperidone                                 |
| 667   | Risperidone 500microgram tablets                           | Risperidone                                 |
| 1320  | Risperidone 1mg tablets                                    | Risperidone                                 |
| 1321  | Risperidone 2mg tablets                                    | Risperidone                                 |
| 2786  | Risperidone 6mg tablets                                    | Risperidone                                 |
| 2787  | Risperidone 4mg tablets                                    | Risperidone                                 |
| 4820  | Risperdal 1mg tablets (Janssen-Cilag Ltd)                  | Risperidone                                 |
| 5219  | Risperidone 3mg tablets                                    | Risperidone                                 |
| 5262  | Risperdal 1mg/ml liquid (Janssen-Cilag Ltd)                | Risperidone                                 |
| 6373  | Risperidone 1mg orodispersible tablets sugar free          | Risperidone                                 |
| 7382  | Risperidone 500microgram orodispersible tablets sugar free | Risperidone                                 |
| 9340  | Risperdal 3mg tablets (Janssen-Cilag Ltd)                  | Risperidone                                 |

|       |                                                                                                      |             |
|-------|------------------------------------------------------------------------------------------------------|-------------|
| 9475  | Risperdal 4mg tablets (Janssen-Cilag Ltd)                                                            | Risperidone |
| 9659  | Risperdal 2mg tablets (Janssen-Cilag Ltd)                                                            | Risperidone |
| 11799 | Risperdal 6mg tablets (Janssen-Cilag Ltd)                                                            | Risperidone |
| 11821 | Risperdal Quicklet 500microgram orodispersible tablets (Janssen-Cilag Ltd)                           | Risperidone |
| 11828 | Risperidone 2mg orodispersible tablets sugar free                                                    | Risperidone |
| 14767 | Risperdal Consta 50mg powder and solvent for suspension for injection vials (Janssen-Cilag Ltd)      | Risperidone |
| 14789 | Risperdal Consta 37.5mg powder and solvent for suspension for injection vials (Janssen-Cilag Ltd)    | Risperidone |
| 16006 | Risperdal Quicklet 2mg orodispersible tablets (Janssen-Cilag Ltd)                                    | Risperidone |
| 16425 | Risperidone 37.5mg powder and solvent for suspension for injection vials                             | Risperidone |
| 16434 | Risperidone 25mg powder and solvent for suspension for injection vials                               | Risperidone |
| 16489 | Risperidone 50mg powder and solvent for suspension for injection vials                               | Risperidone |
| 16908 | Risperdal Consta 25mg powder and solvent for suspension for injection vials (Janssen-Cilag Ltd)      | Risperidone |
| 16986 | Risperdal Quicklet 1mg orodispersible tablets (Janssen-Cilag Ltd)                                    | Risperidone |
| 35141 | Risperidone 3mg orodispersible tablets sugar free                                                    | Risperidone |
| 35548 | Risperdal Quicklet 3mg orodispersible tablets (Janssen-Cilag Ltd)                                    | Risperidone |
| 35589 | Risperidone 4mg orodispersible tablets sugar free                                                    | Risperidone |
| 35953 | Risperdal Quicklet 4mg orodispersible tablets (Janssen-Cilag Ltd)                                    | Risperidone |
| 46677 | Risperidone 500microgram tablets (Actavis UK Ltd)                                                    | Risperidone |
| 47832 | Risperidone 500microgram tablets (A A H Pharmaceuticals Ltd)                                         | Risperidone |
| 51240 | Risperidone 125micrograms/5ml oral solution                                                          | Risperidone |
| 51444 | Risperdal Consta 50mg powder and solvent for suspension for injection vials (Waymade Healthcare Plc) | Risperidone |
| 54346 | Risperidone 1mg tablets (Teva UK Ltd)                                                                | Risperidone |
| 55661 | Risperidone 1mg tablets (Kent Pharmaceuticals Ltd)                                                   | Risperidone |
| 56387 | Risperidone 1mg/ml oral solution sugar free (Alliance Healthcare (Distribution) Ltd)                 | Risperidone |
| 57217 | Risperidone 1mg tablets (Generics (UK) Ltd)                                                          | Risperidone |
| 58822 | Risperidone 4mg tablets (Almus Pharmaceuticals Ltd)                                                  | Risperidone |
| 59548 | Risperidone 2mg tablets (Alliance Healthcare (Distribution) Ltd)                                     | Risperidone |
| 59829 | Risperidone 3mg tablets (A A H Pharmaceuticals Ltd)                                                  | Risperidone |
| 12666 | Sertindole 4mg tablets                                                                               | Sertindole  |
| 16998 | Sertindole 12mg tablets                                                                              | Sertindole  |
| 17050 | Sertindole 20mg tablets                                                                              | Sertindole  |
| 19900 | Sertindole 16mg tablets                                                                              | Sertindole  |
| 23162 | Serdolect 16mg tablets (Lundbeck Ltd)                                                                | Sertindole  |
| 25966 | Serdolect 4mg tablets (Lundbeck Ltd)                                                                 | Sertindole  |

|       |                                                                    |                               |
|-------|--------------------------------------------------------------------|-------------------------------|
| 31063 | Serdolect 12mg tablets (Lundbeck Ltd)                              | Sertindole                    |
| 2135  | Sulpiride 200mg tablets                                            | Sulpiride                     |
| 8903  | Sulpiride 200mg/5ml oral solution sugar free                       | Sulpiride                     |
| 9247  | Sulpiride 400mg tablets                                            | Sulpiride                     |
| 10666 | Dolmatil 200mg tablets (Sanofi)                                    | Sulpiride                     |
| 18181 | Sulpor 200mg/5ml oral solution (Rosemont Pharmaceuticals Ltd)      | Sulpiride                     |
| 18352 | Sulpitil 200mg tablets (Pfizer Ltd)                                | Sulpiride                     |
| 24053 | Sulparex 200mg Tablet (E R Squibb and Sons Ltd)                    | Sulpiride                     |
| 24069 | Dolmatil 400mg tablets (Sanofi)                                    | Sulpiride                     |
| 34810 | Sulpiride 200mg tablets (Wockhardt UK Ltd)                         | Sulpiride                     |
| 41675 | Sulpiride 200mg tablets (IVAX Pharmaceuticals UK Ltd)              | Sulpiride                     |
| 43423 | Sulpiride 200mg tablets (A A H Pharmaceuticals Ltd)                | Sulpiride                     |
| 43522 | Sulpiride 200mg tablets (Teva UK Ltd)                              | Sulpiride                     |
| 1192  | Thioridazine 10mg tablets                                          | Thioridazine hydrochloride    |
| 1218  | Thioridazine 25mg tablets                                          | Thioridazine hydrochloride    |
| 1314  | Thioridazine 50mg tablets                                          | Thioridazine hydrochloride    |
| 2801  | Thioridazine 10mg/5ml Oral solution                                | Thioridazine Hydrochloride    |
| 3021  | Thioridazine 100mg tablets                                         | Thioridazine hydrochloride    |
| 3605  | Thioridazine 25mg/5ml oral solution                                | Thioridazine hydrochloride    |
| 10405 | Thioridazine 25mg/5ml sugar free Oral solution                     | Thioridazine Hydrochloride    |
| 15598 | Thioridazine 100mg/5ml sugar free Oral solution                    | Thioridazine Hydrochloride    |
| 17399 | Thioridazine 50mg/5ml Oral solution                                | Thioridazine Hydrochloride    |
| 34905 | Thioridazine 25mg Tablet (IVAX Pharmaceuticals UK Ltd)             | Thioridazine hydrochloride    |
| 35787 | Thioridazine 50mg Tablet (IVAX Pharmaceuticals UK Ltd)             | Thioridazine hydrochloride    |
| 42816 | Thioridazine 50mg/5ml Oral solution (Rosemont Pharmaceuticals Ltd) | Thioridazine Hydrochloride    |
| 45860 | Thioridazine 100mg Tablet (IVAX Pharmaceuticals UK Ltd)            | Thioridazine hydrochloride    |
| 47361 | Thioridazine 10mg/5ml Oral solution (Rosemont Pharmaceuticals Ltd) | Thioridazine Hydrochloride    |
| 1245  | Trifluoperazine 5mg tablets                                        | Trifluoperazine hydrochloride |
| 1316  | Stelazine 5mg tablets (Mercury Pharma Group Ltd)                   | Trifluoperazine hydrochloride |
| 1318  | Stelazine 1mg tablets (Mercury Pharma Group Ltd)                   | Trifluoperazine hydrochloride |
| 1857  | Trifluoperazine 1mg tablets                                        | Trifluoperazine hydrochloride |
| 3356  | Parstelin Tablet (GlaxoSmithKline Consumer Healthcare)             | Trifluoperazine Hydrochloride |
| 3955  | Tranlycypromine with trifluoperazine Tablet                        | Trifluoperazine Hydrochloride |
| 7479  | Stelazine 1mg/ml Injection (Goldshield Pharmaceuticals Ltd)        | Trifluoperazine Hydrochloride |
| 8537  | Trifluoperazine 1mg/ml Injection                                   | Trifluoperazine Hydrochloride |
| 8985  | Stelazine 1mg/5ml syrup (Mercury Pharma Group Ltd)                 | Trifluoperazine hydrochloride |

|       |                                                                            |                                |
|-------|----------------------------------------------------------------------------|--------------------------------|
| 11531 | Trifluoperazine 5mg/5ml oral solution sugar free                           | Trifluoperazine hydrochloride  |
| 13145 | Trifluoperazine 1mg/5ml oral solution sugar free                           | Trifluoperazine hydrochloride  |
| 18289 | Stelazine 10mg/ml Concentrate (Goldshield Pharmaceuticals Ltd)             | Trifluoperazine Hydrochloride  |
| 18668 | Trifluoperazine 10mg/ml concentrate                                        | Trifluoperazine Hydrochloride  |
| 24890 | Trifluoperazine with tranylcypromine 1mg + 10mg Tablet                     | Trifluoperazine Hydrochloride  |
| 29948 | Stelazine Forte 1mg/ml oral solution (Mercury Pharma Group Ltd)            | Trifluoperazine hydrochloride  |
| 40162 | Trifluoperazine 1mg tablets (A A H Pharmaceuticals Ltd)                    | Trifluoperazine hydrochloride  |
| 41663 | Trifluoperazine 5mg tablets (A A H Pharmaceuticals Ltd)                    | Trifluoperazine hydrochloride  |
| 21027 | Triperidol 1mg Tablet (Lagap)                                              | Trifluperidol                  |
| 21047 | Triperidol 0.5mg Tablet (Lagap)                                            | Trifluperidol                  |
| 22814 | Trifluperidol 1mg Tablet                                                   | Trifluperidol                  |
| 23659 | Trifluperidol 0.5mg Tablet                                                 | Trifluperidol                  |
| 9515  | Zoleptil 50 tablets (Movianto UK Ltd)                                      | Zotepine                       |
| 17504 | Zotepine 25mg tablets                                                      | Zotepine                       |
| 25336 | Zotepine 50mg tablets                                                      | Zotepine                       |
| 28759 | Zotepine 100mg tablets                                                     | Zotepine                       |
| 30088 | Zoleptil 25 tablets (Movianto UK Ltd)                                      | Zotepine                       |
| 5762  | Clopixol acuphase 50mg/ml Oily injection (Lundbeck Ltd)                    | Zuclopenthixol Acetate         |
| 14576 | Zuclopenthixol acetate 50mg/ml oily injection                              | Zuclopenthixol Acetate         |
| 24270 | Zuclopenthixol acetate 50mg/1ml solution for injection ampoules            | Zuclopenthixol acetate         |
| 31537 | Zuclopenthixol acetate 100mg/2ml solution for injection ampoules           | Zuclopenthixol acetate         |
| 31538 | Clopixol Acuphase 100mg/2ml solution for injection ampoules (Lundbeck Ltd) | Zuclopenthixol acetate         |
| 36101 | Clopixol Acuphase 50mg/1ml solution for injection ampoules (Lundbeck Ltd)  | Zuclopenthixol acetate         |
| 3774  | Clopixol 200mg/ml Oily injection (Lundbeck Ltd)                            | Zuclopenthixol Decanoate       |
| 3775  | Zuclopenthixol decanoate 200mg/ml oily injection                           | Zuclopenthixol Decanoate       |
| 12073 | Clopixol Conc 500mg/1ml solution for injection ampoules (Lundbeck Ltd)     | Zuclopenthixol decanoate       |
| 12224 | Zuclopenthixol decanoate 500mg/1ml solution for injection ampoules         | Zuclopenthixol decanoate       |
| 22049 | Clopixol 200mg/1ml solution for injection ampoules (Lundbeck Ltd)          | Zuclopenthixol decanoate       |
| 28355 | Zuclopenthixol decanoate 200mg/1ml solution for injection ampoules         | Zuclopenthixol decanoate       |
| 1319  | Clopixol 10mg tablets (Lundbeck Ltd)                                       | Zuclopenthixol dihydrochloride |
| 9347  | Clopixol 25mg tablets (Lundbeck Ltd)                                       | Zuclopenthixol dihydrochloride |

|       |                                               |                                |
|-------|-----------------------------------------------|--------------------------------|
| 9686  | Zuclopenthixol 10mg tablets                   | Zuclopenthixol dihydrochloride |
| 12707 | Zuclopenthixol 2mg tablets                    | Zuclopenthixol dihydrochloride |
| 13368 | Clopixol 2mg tablets (Lundbeck Ltd)           | Zuclopenthixol dihydrochloride |
| 13600 | Zuclopenthixol 25mg tablets                   | Zuclopenthixol dihydrochloride |
| 50214 | Olanzapine 5mg orodispersible tablets         |                                |
| 51558 | Amisulpride 12.5mg/5ml oral suspension        |                                |
| 52050 | Haloperidol 1.5mg/5ml oral suspension         |                                |
| 52076 | Amisulpride 12.5mg/5ml oral solution          |                                |
| 52940 | Sondate XL 50mg tablets (Teva UK Ltd)         |                                |
| 55622 | Olanzapine 10mg orodispersible tablets        |                                |
| 56143 | Olanzapine 15mg orodispersible tablets        |                                |
| 56215 | Quetiapine 50mg/5ml oral solution             |                                |
| 58067 | Quetiapine 125mg/5ml oral suspension          |                                |
| 58425 | Seroquel XL 50mg tablets (DE Pharmaceuticals) |                                |
| 58936 | Tenprolide XL 50mg tablets (Actavis UK Ltd)   |                                |
